# Supplementary material for: Enhanced Faraday rotation by a Fano resonance in substrate-free three-dimensional magnetoplasmonic structures
Source: Royal Society of Chemistry journal article supplement (doi:10.1039/d3nr02737f), 2023-01-01
Supplement: d3nr02737f1.pdf [file d3nr02737f1.pdf]

## Supplementary Information

### Enhanced Faraday rotation by Fano resonance in substrate-free three-dimensional magnetoplasmonic structures

Tong-Huai Cheng,<sup>a</sup> Weihao Yang,<sup>b</sup> Zhaochao Liu,<sup>a</sup> Hua Yu Feng,<sup>\*c</sup> Jun Qin,<sup>\*b</sup> Yifei Ma,<sup>a</sup> Shicheng Li,<sup>a</sup> Lei Bi<sup>\*b</sup> and Feng Luo<sup>\*a</sup>

*a. Tianjin Key Lab for Rare Earth Materials and Applications, Center for Rare Earth and Inorganic Functional Materials, School of Materials Science and Engineering, Nankai University, Tianjin 300350, China.*

*b. National Engineering Research Center of Electromagnetic Radiation Control Materials, State Key Laboratory of Electronic Thin Films and Integrated Devices, University of Electronic Science and Technology of China, Chengdu 610054, China.*

*c. School of Microelectronics, Shandong University, Ji'nan 250100, China.*

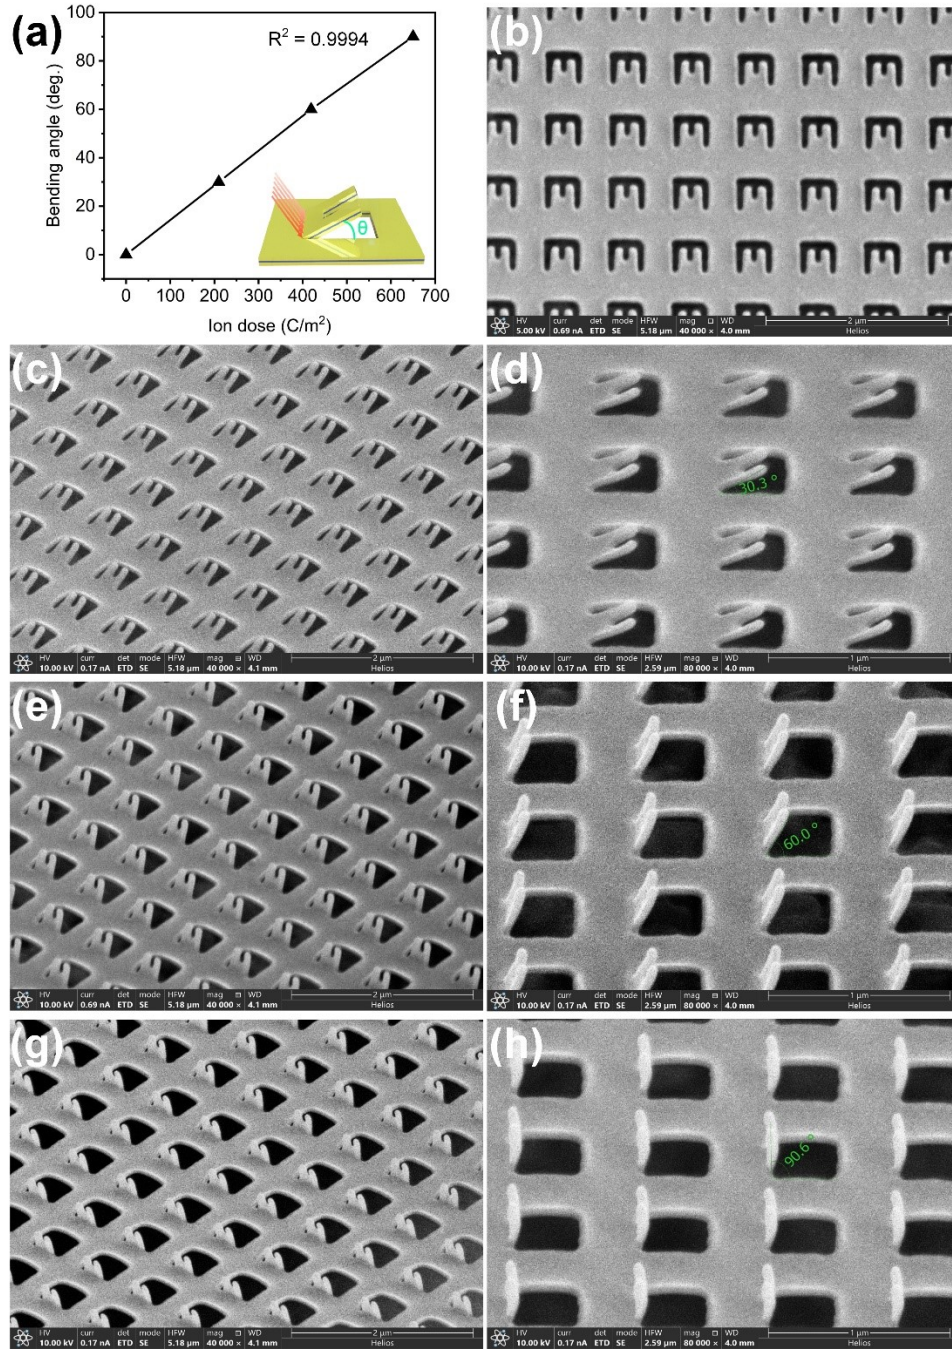

Fig. S1 (a) Effect of ion dose on the bending angle of split-ring. (b) Flat split-ring. (c, d) Split-ring with a bending angle of 30 deg. (e, f) Split-ring with a bending angle of 60 deg. (g, h) Split-ring with a bending angle of 90 deg (the vertical split-ring in the main text).

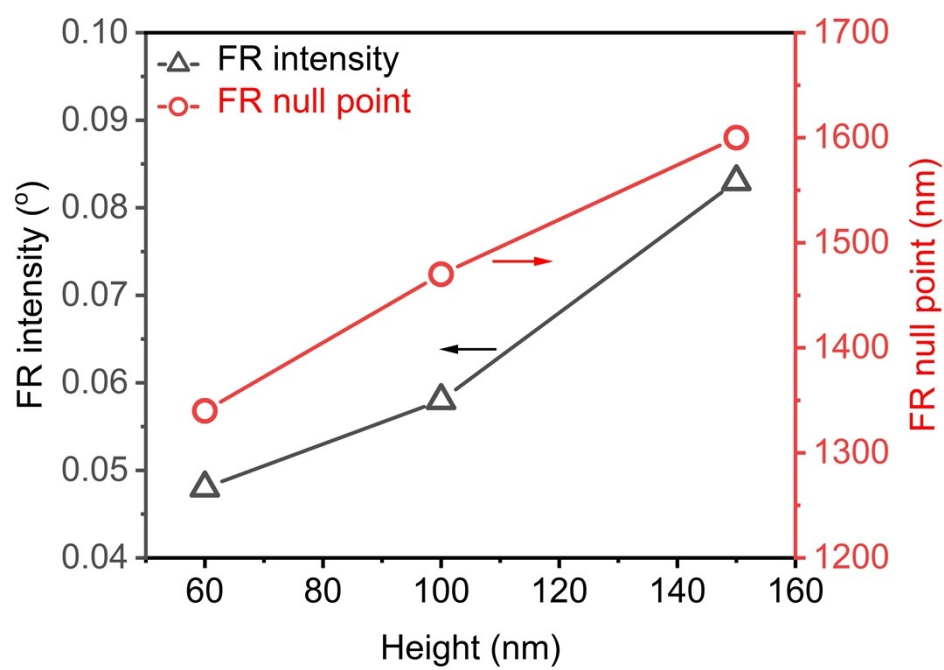

Fig. S2 Effects of  $h$  value on the intensity of FR and the position of FR null point.
